# Supplementary material
Source: publisher figshare collection journal article supplement (https://tandf.figshare.com/ndownloader/files/3698401)
Supplement: Supplementary file 1 [file 3698401]

**Supplementary Material Online: Appendix 1**

**Search Strategies for Systematic Review = Published Literature:**

**PubMed:**

| **#** | **Searches** | **Results** |
| --- | --- | --- |
| 1  2  3  4  5  6  7  8  9  10  11  12  13  14  15  16  17  18  19  20  21  22  23  2 | medical student*  "Students, Medical"[Mesh]  nursing student*  "Students, Nursing"[Mesh]  (((medical student*) OR "Students, Medical"[Mesh]) OR nursing  student*) OR "Students, Nursing"[Mesh]  elective*  rotation*  clerkship*  "Clinical Clerkship"[Mesh]  (((elective*) OR rotation*) OR clerkship*) OR "Clinical Clerkship"[Mesh]  ethic*  "Ethics"[Mesh] OR "Ethics, Nursing"[Mesh] OR "Ethics, Professional"[Mesh] OR "Principle-Based Ethics"[Mesh]  professionalism  ((ethic*) OR ("Ethics"[Mesh] OR "Ethics, Nursing"[Mesh] OR "Ethics, Professional"[Mesh] OR "Principle-Based Ethics"[Mesh])) OR professionalism  teaching  "Teaching"[Mesh]  training  preparation  education  "Education"[Mesh] OR "Education, Public Health Professional"[Mesh]  intervention*  ((((((teaching) OR "Teaching"[Mesh]) OR training) OR preparation) OR education) OR ("Education"[Mesh] AND "Education, Public Health Professional"[Mesh])) OR intervention*  (((((((medical student*) OR "Students, Medical"[Mesh]) OR nursing student*) OR "Students, Nursing"[Mesh])) AND ((((elective*) OR rotation*) OR clerkship*) OR "Clinical Clerkship"[Mesh])) AND (((ethic*) OR ("Ethics"[Mesh] OR "Ethics, Nursing"[Mesh] OR "Ethics, Professional"[Mesh] OR "Principle-Based Ethics"[Mesh])) OR professionalism)) AND (((((((teaching) OR "Teaching"[Mesh]) OR training) OR preparation) OR education) OR ("Education"[Mesh] OR "Education, Public Health Professional"[Mesh])) OR intervention*) | 37583  22514  21495  17496  58532  61238  108411  5295  3812  173546  168343  125836  5151  198794  909347  68221  1155756  259954  1005470  629930  650394  2025373  342 |

**OVID Medline:**

| **#** | **Searches** | **Results** |
| --- | --- | --- |
| 1  2  3  4  5  6  7  8  9  10  11  12  13  14  15  16  17  18  19  20  21  22  23  24 | Students, Medical/  medical student*.mp  Students, Nursing/  nursing student*.mp  #1 OR #2 OR #3 OR #4  elective*.mp  Rotation/  Rotation*.mp  Clinical Clerkship/  Clerkship*.mp  #6 OR #7 OR #8 OR #9 OR #10  Ethics/ or Ethics, Medical/  ethic*.mp  professionalism.mp  #12 OR #13 OR #14  Teaching/  teaching.mp  training.mp  preparation.mp  Education/ or Education, Medical, Undergraduate/  education.mp  intervention*.mp.  #16 OR #17 OR #18 OR #19 OR #20 OR #21 OR #22  #5 AND #11 AND #15 AND #23 | 22545  26572  17747  9313  57580  60347  20708  105097  3822  5229  169304  52426  135348  4950  139099  42803  142453 284962  253357  37017  584054  620815  1618352  **238** |

**EMBase:**

| **#** | **Searches** | **Results** |
| --- | --- | --- |
| 1  2  3  4  5  6  7  8  9  10  11  12  13  14  15  16  17  18  19  20  21  22  23  24  25 | Medical student/  medical student*.mp  nursing student/  nursing student*.mp  #1 OR #2 OR #3 OR #4  elective*.mp  rotation/  rotation*.mp  clerkship*.mp  #6 OR #7 OR #8 OR #9  ethics/ or medical ethics/  ethic*.mp  professionalism/  professionalism.mp  #11 OR #12 OR #13 OR #14  teaching/  teaching.mp  training/  training.mp  preparation.mp  education/ or medical education/  education.mp  intervention*.mp.  #16 OR #17 OR #18 OR #19 OR #20 OR #21 OR #22 OR #23  #5 AND #10 AND #15 AND #24 | 44618  53724  17792  21149  74119  83558  19431  107685  3889  193529  142941  205499  4714  8847  212244  68972  169198  63165  382632  298502  458933  882626  821953  2175216  **321** |
|  |  |  |

**Global Health:**

| **#** | **Searches** | **Results** |
| --- | --- | --- |
| 1  2  3  4  5  6  7  8  9  10  11  12  13  14  15  16  17  18  19  20  21  22  23  24  25  26 | medical student/  medical student*.mp  nursing student/  nursing student*.mp  #1 OR #2 OR #3 OR #4  elective*.mp  rotation/  rotation*.mp  clerkship*.mp  #6 OR #7 OR #8 OR #9  ethics/ or medical ethics/  ethic*.mp  professionalism/  professionalism.mp  #11 OR #12 OR #13 OR #14  teaching/  teaching.mp  training/  training.mp  preparation.mp  medical education/ or education/  education.mp  intervention/  intervention*.mp.  #16 OR #17 OR #18 OR #19 OR #20 OR #21 OR #22 OR #23 OR #24  #5 AND #10 AND #15 AND #25 | 2186  3164  0  491  3565  3025  42  2895  60  5945  3912  8038  94  282  8273  1518  15577  7566  34273  34238  18396  84837  1126  67462  **205689**  **4** |

**SCOPUS: Results 451**

| **#** | **Searches**  ((((TITLE-ABS-KEY(**medical** **student***)) OR (TITLE-ABS-KEY(**nursing** **student***)))) AND (((TITLE-ABS-KEY(**elective***)) OR (TITLE-ABS-KEY(**rotation***)) OR (TITLE-ABS-KEY(**clerkship***)))) AND (((TITLE-ABS-KEY(**ethic***)) OR (TITLE-ABS-KEY(**professionalism**)))) AND (((TITLE-ABS-KEY(**teaching**)) OR (TITLE-ABS-KEY(**training**)) OR (TITLE-ABS-KEY(**preparation**)) OR (TITLE-ABS-KEY(**intervention***)) OR (TITLE-ABS-KEY(**education**))))) |  |
| --- | --- | --- |

**Web of Science Results: 250**

| **#** | **Searches**  TS=(**medical** **student*** OR **nursing** **student*)** AND TS=(**elective*** OR **rotation*** OR **clerkship***) AND TS=(**ethic*** OR **professionalism**) AND TS=(**teaching** OR **training** OR **preparation** OR **intervention*** OR **education**). Doc Type=All document types; Languages=All languages. |  |
| --- | --- | --- |

**ProQuest ASSIA: Results: 19**

| **#** | **Searches**  ((medical student*) OR SU.exact("MEDICAL STUDENTS") OR (nursing student*) OR ((SU.exact("STUDENTS") OR SU.exact("STUDENTS 04208")) AND (SU.exact("NURSING") OR SU.exact("HEALTH SCIENCES NURSING")))) AND (elective* OR rotation* OR SU.exact("ROTATION") OR clerkship*) AND (SU.exact("ETHICS") OR professionalism OR SU.exact("PROFESSIONALISM")) AND (teaching OR SU.exact("TEACHING") OR training OR (SU.exact("TRAINING") OR SU.exact("TRAINING 04559")) OR preparation OR SU.exact("PREPARATION") OR education OR (SU.exact("EDUCATION") OR SU.exact("EDUCATION 04561")) OR intervention* OR (SU.exact("INTERVENTION") OR SU.exact("INTERVENTION 04938"))) |  |
| --- | --- | --- |

**ProQuest Sociological Abstracts: Results: 4**

| **#** | **Searches**  ((medical student*) OR SU.exact("MEDICAL STUDENTS") OR (nursing student*) OR (SU.exact("NURSING") OR SU.exact("HEALTH SCIENCES NURSING"))) AND (elective* OR rotation* OR SU.exact("ROTATION") OR clerkship*) AND (ethic* OR SU.exact("ETHICS") OR professionalism OR SU.exact("PROFESSIONALISM")) AND (teaching OR SU.exact("TEACHING") OR training OR (SU.exact("TRAINING") OR SU.exact("TRAINING 04559")) OR preparation OR education OR (SU.exact("EDUCATION") OR SU.exact("EDUCATION 04561")) OR intervention* OR (SU.exact("INTERVENTION") OR SU.exact("INTERVENTION 04938"))) |  |
| --- | --- | --- |

**ProQuest ERIC: Results: 14**

| **#** | **Searches**  ((medical student*) OR SU.exact("MEDICAL STUDENTS") OR (nursing student*) OR SU.exact("NURSING STUDENTS")) AND (elective* OR rotation* OR clerkship*) AND (ethic* OR SU.exact("ETHICS") OR professionalism) AND (teaching OR SU.exact("TEACHING") OR training OR (SU.exact("TRAINING") OR SU.exact("TRAINING 04559")) OR preparation OR education OR (SU.exact("EDUCATION") OR SU.exact("EDUCATION 04561")) OR intervention* OR (SU.exact("INTERVENTION") OR SU.exact("INTERVENTION 04938"))) |  |
| --- | --- | --- |

**Grey Literature:**

| **#**  **1**  **2**  **3**  **4**  **5** | **Searches (Google)**  ethical electives training  ethical electives teaching  ethical electives preparation  ethical electives education  ethical electives intervention  **Recommendations from Expert Advisors** | **Results**  **6**  **2**  **4**  **3**  **2**  **5** |
| --- | --- | --- |

**Supplementary Material Online: Appendix 2**

**Assessment of Methodological Quality:**

**Levels of Evidence**

| **Level Of Evidence** | **Description** |
| --- | --- |
| Level I | Based on randomized, controlled trials (or meta-analysis of such trials) of adequate size to ensure a low risk of incorporating false-positive or false-negative results |
| Level II | Based on randomized, controlled trials that are too small to provide Level I evidence. These may show either positive trends that are not statistically significant or no trends and are associated with a high risk of false-negative results |
| Level III | Based on non-randomized, controlled or cohort studies, case series, case controlled studies, or cross-sectional studies |
| Level IV | Based on the opinion of respected authorities or that of an expert committee as indicated in published consensus conferences or guidelines |
| Level Va | Based on the opinion of those individuals who have knowledge in one particular field and are applying that knowledge to another field; or summarizes the collective wisdom or experiences of others in the field |
| Level Vb | Based on the opinion of those individuals who have written and reviewed the guidelines, based on their experience, knowledge of the relevant literature, and discussion with their peers |
| Ungraded  (VI) | Does not meet the above Criteria |

**Source taken from Benzies, K. M., Premji, S., Hayden, K. A. and Serrett, K. (2006), State-of-the-Evidence Reviews: Advantages and Challenges of Including Grey Literature. Worldviews on Evidence-Based Nursing; 3: 55–61**
